# Supplementary material
Source: Springer Nature journal article supplement (https://www.springermedizin.de/resource/supplementary/12931_2013_1383_MOESM7_ESM.pdf/9426148)

**A. Basal cell**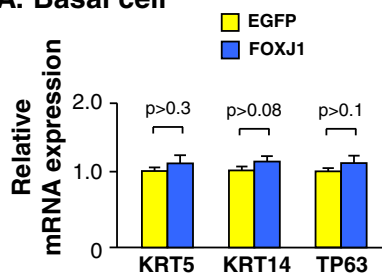**B. Secretory cell**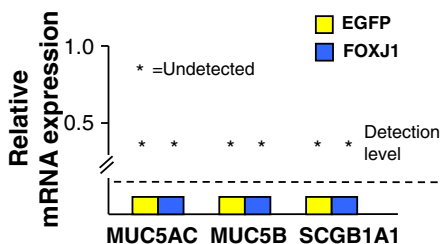**C. Ciliated cell**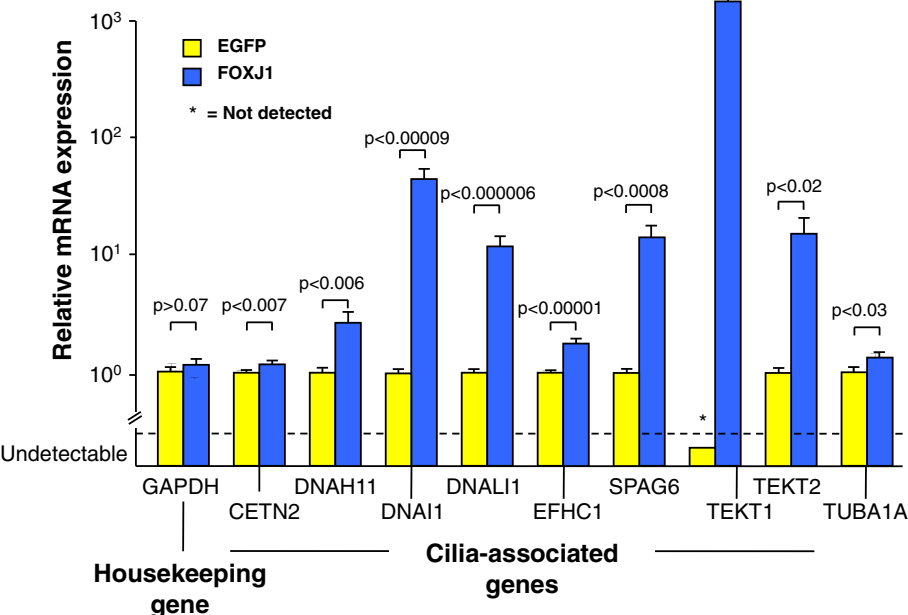**D. Promoter**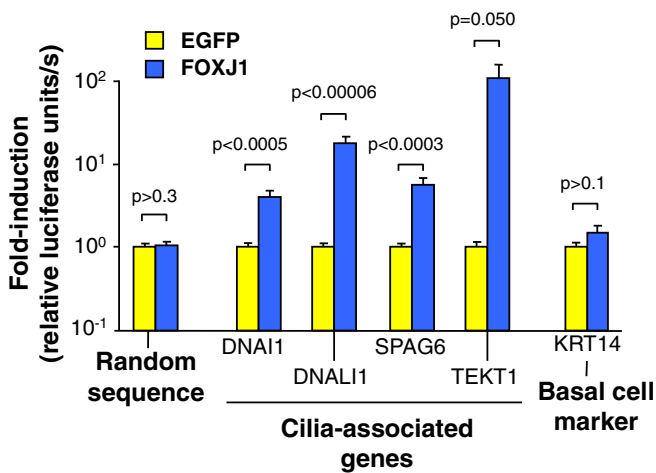

Supplement: MOESM7 [file 9426148]
